# Supplementary material
Source: MDPI journal article supplement (https://www.mdpi.com/2673-9496/2/1/3)
Supplement: s1 [file s1]

## Questionnaire Guide for fish farmers

Name of fish farmer..... Sub-county.....

Parish.....Village.....

Tel.no.....

1. Sex                      a. Male                      b. Female

2. Age in years .....

3. Level of education in years.....

4. Number of fish ponds owned .....

5. Size of pond.....

6. Depth of pond.....

## 7. Type of pond

a. Earthen                                      b. Tank                                      c. Others .....

## 8. Source of pond water

a. Spring                  b. surface water/stream                  c. piped                  d. others.....

9. Number of ponds stocked in 2019.....

10. Number of fish stocked.....

11. Type of fish stocked.....

13. Size of fish at stocking.....

14. Date of stocking.....

15. Source of fish seed/fry.....

16. Type of feeds used .....

17. Type of manure/fertilizer (s) applied at the farm.....

18. Culture period .....

19. Number of fish harvested so far.....

20. Date of first harvest.....

21. Size at first harvest.....

22. Weight of fish at harvest .....

23. Number eaten at home monthly.....

24. Number of fish sold annually/monthly.....

25. Market Price per fish.....

26. Annual income from each fish pond.....

27. Total annual income from fish farming.....

28. Pond age .....

29. Other factors hindering fish pond productivity

.....  
.....  
.....

30. Other economic activities at and around the farm

.....  
.....  
.....

31. Challenges at the fish farm

.....  
.....
