# Supplementary material
Source: MDPI journal article supplement (https://www.mdpi.com/2673-9496/2/1/3)
Supplement: s1 [file s1]

**Interview Guide for Agriculture officer in charge of fish farming and local Leader  
(Secretary for production) at the sub-county**

Name of sub-county.....

Name of respondent.....

Title.....

No. fish farms in the sub-county.....

No. of fish ponds.....

No. of ponds stocked.....

Average size of fish at harvest.....

Market price.....

Name of fish farmers who were supported to stock by Government or self -supported in 2019

1.....

2.....

3.....

4.....

5.....

6.....

Type of support from government

.....  
.....

Challenges faced by fish farmers in the sub-county

.....  
.....  
.....
